# Supplementary material for: From big data to diagnosis and prognosis: gene expression signatures in liver hepatocellular carcinoma
Source: PeerJ journal article supplement (doi:10.7717/peerj.3089), 2017-03-14

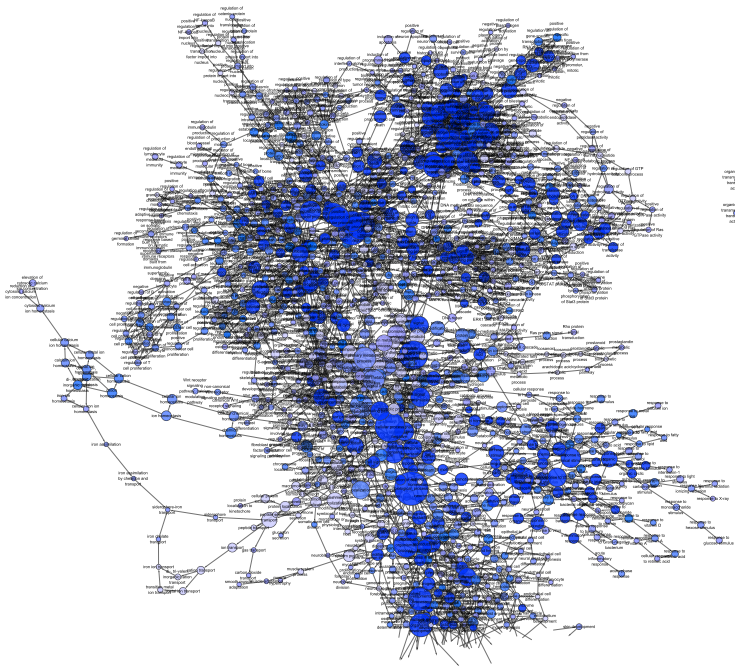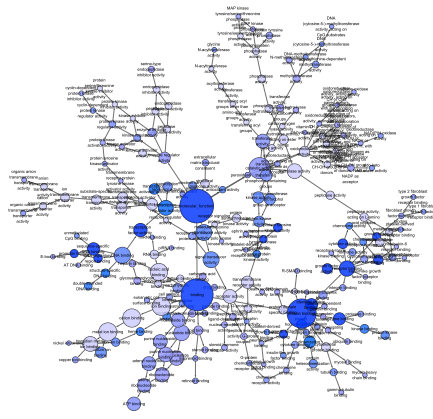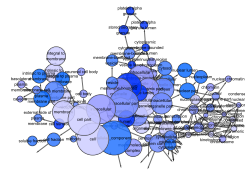

Supplement: Supplementary_Figure_2.pdf [file Supplementary_Figure_2.pdf]
